# Supplementary material
Source: publisher figshare collection journal article supplement (https://acs.figshare.com/ndownloader/files/5675283)
Supplement: Supplementary file 1 [file 5675283]

## **Supporting Information For:**

### **Heat-induced polycondensation reaction with self-generated blowing agent forming aromatic thermosetting copolyester foams**

Mete Bakir<sup>a</sup>, Jacob L. Meyer<sup>c</sup>, James Economy<sup>b,c</sup>, Iwona Jasiuk<sup>a,\*</sup>

- a) Department of Mechanical Science and Engineering, University of Illinois at Urbana-Champaign, 61801, Urbana, IL, USA.
- b) Department of Materials Science and Engineering, University of Illinois at Urbana-Champaign, 61801, Urbana, IL, USA.
- c) ATSP Innovations, 61820, Champaign, IL, USA.

\* Correspondence to: Iwona Jasiuk. Email: [ijasiuk@illinois.edu](mailto:ijasiuk@illinois.edu)

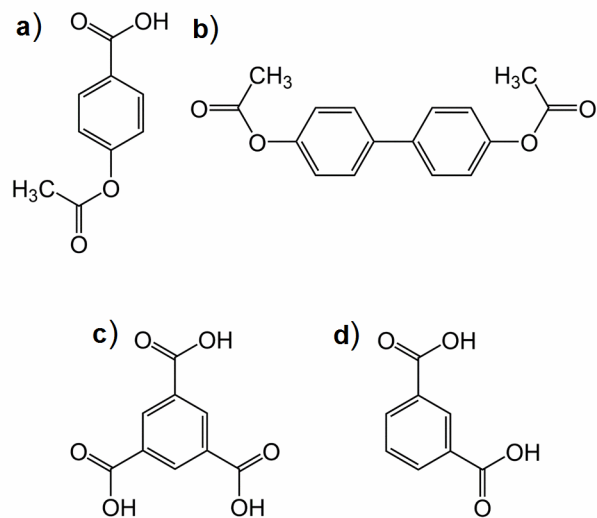

**Figure S1.** Chemical structures of the monomers **a)** 4-acetoxybenzoic acid (ABA), **b)** biphenol diacetate (BDPA), **c)** trimesic acid (TMA) and **d)** isophthalic acid (IPA).

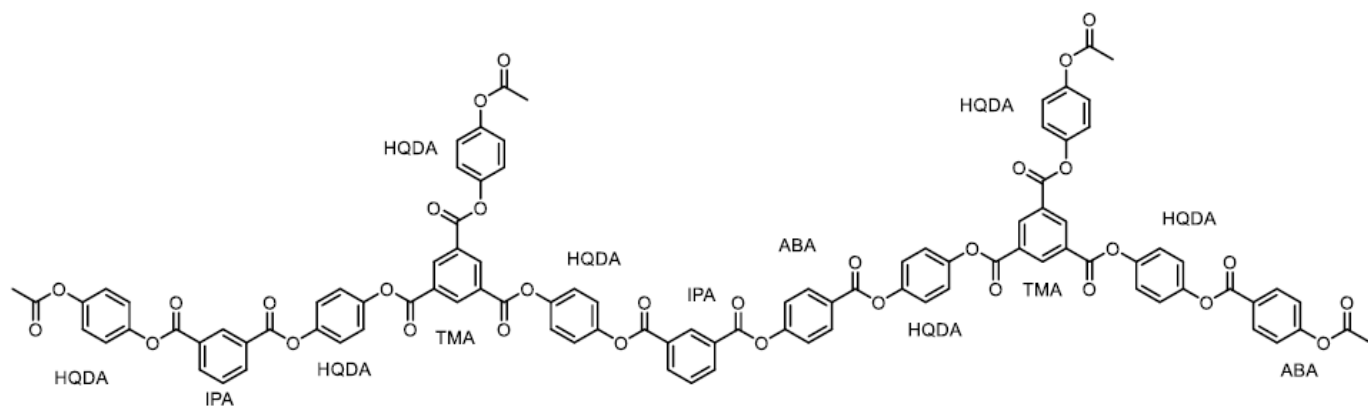

**Figure S2.** Chemical structure of aromatic acetoxy end-group oligomer

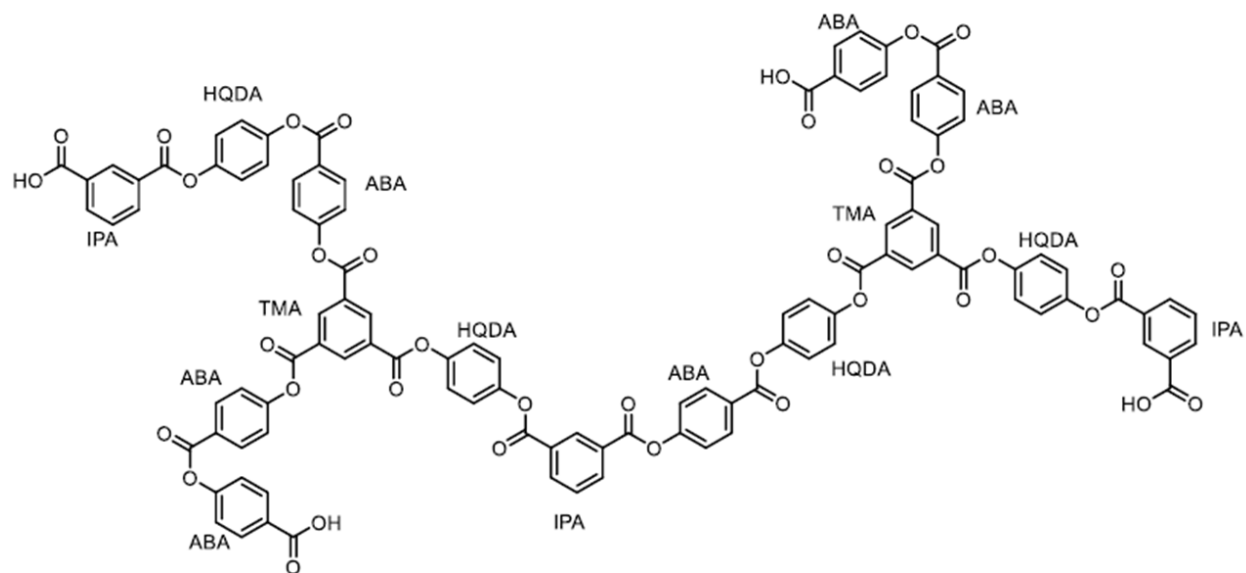

**Figure S3.** Chemical structure of aromatic carboxylic acid end-group oligomer

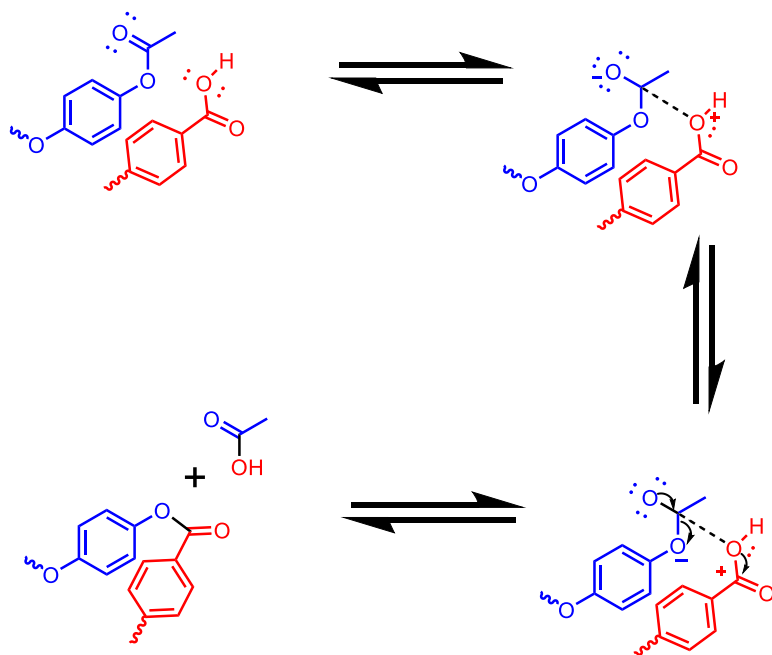

**Figure S4.** Cure mechanism via interchain transesterification reaction.

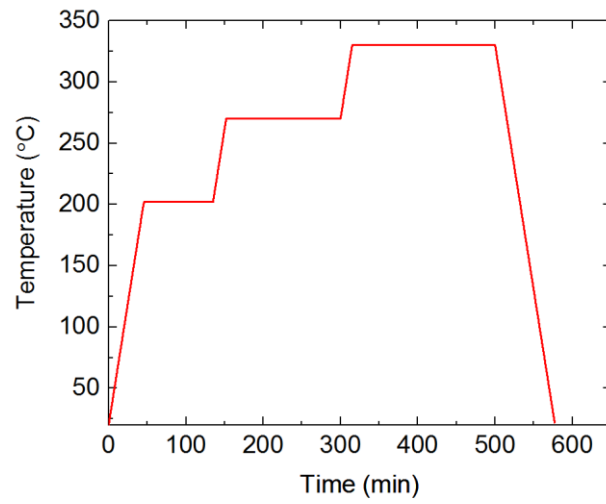

**Figure S5.** Cure cycle run for fabrication of physical foam products. Three temperature-hold stages set at 202 °C, 270 °C and 330 °C corresponding to the melting, the bubble growth and the cure steps of the foaming processes.
